# Supplementary material
Source: HighWire-hosted journal article supplement (https://erj.ersjournals.com/content/55/6/2001217)
Supplement: inline-supplementary-material-1 [file inline-supplementary-material-1.pdf]

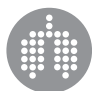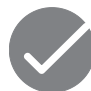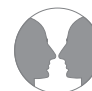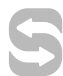

SHAREABLE PDF

# Abnormal pulmonary function in COVID-19 patients at time of hospital discharge

Xiaoneng Mo<sup>1,4</sup>, Wenhua Jian<sup>2,4</sup>, Zhuquan Su<sup>2,4</sup>, Mu Chen<sup>1</sup>, Hui Peng<sup>1</sup>, Ping Peng<sup>1</sup>, Chunliang Lei<sup>3</sup>, Ruchong Chen<sup>2,5</sup>, Nanshan Zhong<sup>2,5</sup> and Shiyue Li<sup>2,5</sup>

**Affiliations:** <sup>1</sup>Dept of Respiratory Medicine, Guangzhou Eighth People's Hospital, Guangzhou, China. <sup>2</sup>China State Key Laboratory of Respiratory Disease, National Clinical Research Center for Respiratory Disease, Guangzhou Institute of Respiratory Health, First Affiliated Hospital of Guangzhou Medical University, Guangzhou, China. <sup>3</sup>Dept of Hepatology, Guangzhou Eighth People's Hospital, Guangzhou, China. <sup>4</sup>Xiaoneng Mo, Wenhua Jian and Zhuquan Su are joint first authors. <sup>5</sup>Ruchong Chen, Nanshan Zhong and Shiyue Li are joint corresponding authors.

**Correspondence:** Shiyue Li, China State Key Laboratory of Respiratory Disease, National Clinical Research Center for Respiratory Disease, First Affiliated Hospital of Guangzhou Medical University, Guangzhou, 510120, China. E-mail: lishiyue@188.com

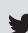 @ERSpublications

**In discharged survivors with COVID-19, impairment of diffusion capacity is the most common abnormality of lung function, followed by restrictive ventilatory defects, which are both associated with the severity of the disease** <https://bit.ly/2yUaBaT>

**Cite this article as:** Mo X, Jian W, Su Z, *et al.* Abnormal pulmonary function in COVID-19 patients at time of hospital discharge. *Eur Respir J* 2020; 55: 2001217 [<https://doi.org/10.1183/13993003.01217-2020>].

This single-page version can be shared freely online.

## To the Editor:

On 11 March 2020, the World Health Organization (WHO) declared coronavirus disease 2019 (COVID-19) as a pandemic. As of 22 April, more than 2.4 million cases have been confirmed worldwide [1]. In light of the widely documented lung injuries related to COVID-19 [2, 3], concerns have been raised regarding the assessment of lung injury for discharged patients. A recent report portrayed that discharged patients with COVID-19 pneumonia still have residual abnormalities in chest computed tomography (CT) scans, with ground-glass opacity as the most common pattern [4]. Persistent impairment of pulmonary function and exercise capacity have been known to last for months or even years [5–8] in the recovered survivors from other coronavirus pneumonia (severe acute respiratory syndrome (SARS) and Middle East respiratory syndrome (MERS)). However, until now, there is no report in regard to pulmonary function in discharged COVID-19 survivors. This article aims to describe the characteristics of pulmonary function in these subjects.
